# Supplementary material for: Drought cascades across multiple systems in Central Asia identified based on the dynamic space–time motion approach
Source: Copernicus journal article supplement (doi:10.5194/hess-27-4115-2023), 2023-11-15
Supplement: Supplementary file 1 [file hess-27-4115-2023-supplement.pdf]

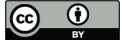

*Supplement of*

## **Drought cascades across multiple systems in Central Asia identified based on the dynamic space–time motion approach**

**Lu Tian et al.**

*Correspondence to:* Lu Tian (lu.tian@tum.de)

The copyright of individual parts of the supplement might differ from the article licence.

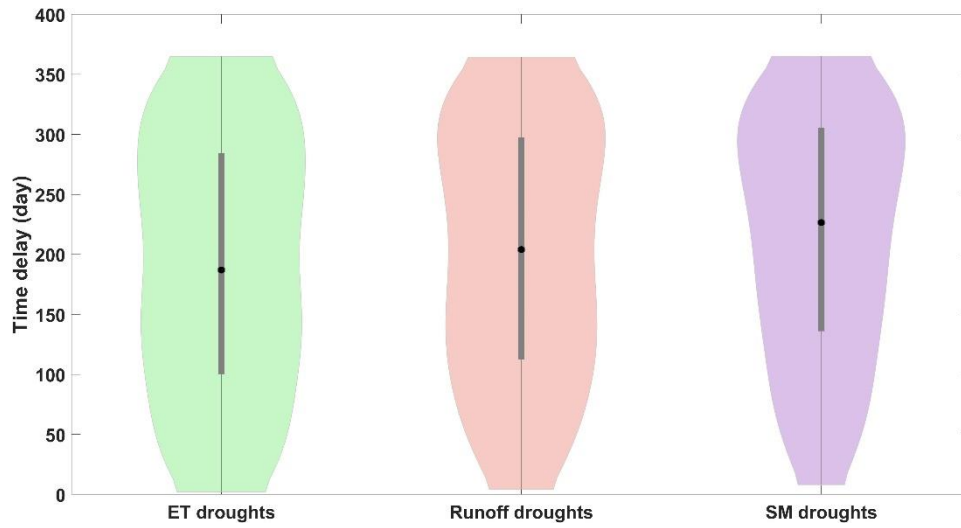

**Figure S1. Violin boxplot of time delay for the ET, Runoff, and SM drought in all cascading drought events**
